# Supplementary material for: COVID-19 in Africa: Underreporting, demographic effect, chaotic dynamics, and mitigation strategy impact
Source: PubMed Central journal article supplement (PMC9518880; doi:10.1371/journal.pntd.0010735), 2022-09-16
Supplement: pntd.0010735.s013.pdf [file pntd.0010735.s013.pdf]

## S1 Appendix for

### **Covid-19 in Africa: underreporting, demographic effect, chaotic dynamics, and mitigation strategies impact**

**Authors:** Nathan Thenon<sup>1,2†</sup>, Marisa Peyre<sup>2</sup>, Mireille Huc<sup>1</sup>, François Roger<sup>2</sup>, Sylvain Mangiarotti<sup>1\*†</sup>.

\*To whom correspondence should be sent: [sylvain.mangiarotti@ird.fr](mailto:sylvain.mangiarotti@ird.fr)

†These authors contributed equally to this work

## Appendix S1 - Estimating the contact number

### A. Averaged number of contact estimated from the new cases

The governing equations of the observed dynamics are generally unknown. Here, we use a simplified formulation of the epidemic to explain how to reconstruct the efficacy of the non pharmaceutical measures from a single variable commonly observed under real conditions: the number of new cases per day  $I(t)$ . It will be later applied to the dynamics of the SEi<sup>2</sup>RD model (see S2 Appendix) in order to investigate if, although based on a simple formulation, this formulation can apply to a dynamics of higher complexity.

The SEIRD model is commonly used in epidemiology where  $S$  stands for Susceptible,  $E$  for Exposed and  $i$  for infected,  $R$  for recovered and  $D$  for dead people at time  $t$ :

$$\begin{cases} \frac{dS_t}{dt} = -\frac{\beta}{N_t} S_t i_t \\ \frac{dE_t}{dt} = +\frac{\beta}{N_t} S_t i_t - \alpha E_t \\ \frac{di_t}{dt} = +\alpha S_t i_t - \nu i_t - m i_t \\ \frac{dR_t}{dt} = +\nu i_t \\ \frac{dD_t}{dt} = +m i_t, \end{cases} \quad (1)$$

and  $N_t = S_t + E_t + i_t + R_t$  the total population at time  $t$ . Considering that  $D$  is only a by product of the SEIR model and that the variations of  $N$  are very small (and also slow) in comparison to the other variations, this dynamics can be reduced to the three equations

$$\begin{cases} \frac{dS_t}{dt} = -\frac{\beta}{N_t} S_t i_t \\ \frac{dE_t}{dt} = +\frac{\beta}{N_t} S_t i_t - \alpha E_t \\ \frac{di_t}{dt} = +\alpha S_t i_t - \nu i_t - m i_t, \end{cases} \quad (2)$$

and then, assuming that the exposure plays as a simple delay between the infection stage and infected stage, the system can be rewritten in two equations

$$\begin{cases} \frac{dS_t}{dt} = -\frac{\beta}{N} S_t i_t \\ \frac{di_t}{dt} = +\frac{\beta}{N} S_{t-\tau} i_{t-\tau} - \nu i_t - m i_t, \end{cases} \quad (3)$$

with  $\tau$  the average time delay before an exposed people becomes infected (be he symptomatic or not).

The number of daily new cases  $I_t^{(1)}$  (where the number in bracket denotes the first derivative) is thus given by

$$I_t^{(1)} = + \frac{\beta}{N} S_{t-\tau} i_{t-\tau}, \quad (4)$$

and its cumulative number by

$$I_t^{(0)} = \int + \frac{\beta}{N} S_{t-\tau} i_{t-\tau} dt. \quad (5)$$

Rewriting the first equation of Eqs. (3) into

$$S_{t-\tau} = - \frac{N}{\beta i_{t-\tau}} \frac{dS_{t-\tau}}{dt},$$

we get

$$S_{t-\tau} = S_{t=0} - I_t^{(0)}, \quad (6)$$

by integrating Eq. (5). Replacing Eq. (6) in Eq. (4) we get

$$I_t^{(1)} = + \frac{\beta}{N} (S_{t=0} - I_t^{(0)}) i_{t-\tau}. \quad (7)$$

The exposure ratio can thus be written

$$\beta = \frac{N I_t^{(1)}}{(S_{t=0} - I_t^{(0)}) i_{t-\tau}}. \quad (8)$$

This formula remains valid locally if  $\beta$  is varying with time. As  $i_t$  is not always available, it can be estimated from  $I_t^{(1)}$  such as

$$\hat{i}_t = \int_{t-T}^t I_t^{(1)} dt, \quad (9)$$

with  $T$  the characteristic time of the disease, so that  $\hat{\beta}(t)$  can be entirely deduced from the single variable  $I_t^{(1)}$ . Taking into account the number of vaccination  $V_t$  at time  $t$  (if available), we get

$$\hat{\beta}(t) = \frac{N I_t^{(1)}}{(S_{t=0} - I_t^{(0)} - V_t) i_{t-\tau}}, \quad (10)$$

with  $i_{t-\tau} \neq 0$ . Note that  $i_t$  is composed of both symptomatic and asymptomatic compartment here ( $i_t = i_t^S + i_t^A$ ) and may thus be difficult to estimate practically since asymptomatic people are by definition difficult to count. However, this limitation will only have a marginal effect on the estimate of  $\hat{\beta}(t)$  because it will act similarly onto  $I_t^{(1)}$ . To avoid singularities,  $\hat{\beta}(t)$  is estimated only if  $i_{t-\tau} \geq 100$ . This formulation was tested on synthetic cases and revealed a systematic overestimation (in the range 1.28 to 1.42) when varying the infected period  $T_i$  from 5 to 7.5 days (see Table A in the present S1 Appendix). A correction coefficient  $\xi = 0.75$  such as

$$\hat{\beta}_t = \xi \beta_t \tag{11}$$

was thus applied to get more realistic estimates of the average number of contact per person per time.

Table A:

|         |      |      |      |      |      |      |      |      |      |
|---------|------|------|------|------|------|------|------|------|------|
| $T_i$   | 4.5  | 4.75 | 5    | 5.5  | 6    | 6.5  | 7    | 7.25 | 7.5  |
| $\tau$  | 3.2  | 3.4  | 3.6  | 3.9  | 4.3  | 4.6  | 5.0  | 5.2  | 5.4  |
| $\xi$   | 0.63 | 0.67 | 0.70 | 0.73 | 0.78 | 0.78 | 0.78 | 0.75 | 0.70 |
| $1/\xi$ | 1.59 | 1.50 | 1.42 | 1.37 | 1.28 | 1.28 | 1.28 | 1.33 | 1.42 |

## B. Recovery and Mortality rates

The recovery rate  $\nu$  and the mortality rate  $m$  can also be deduced from  $i_t$  (deduced from  $I_t^{(1)}$  using Eq. 9) and  $R_t^{(1)}$  (to be estimated numerically from  $R_t$  )

$$\hat{\nu}(t) = \frac{R_t^{(1)}}{i_t}, \quad (12)$$

or  $D_t^{(1)}$  (to be estimated numerically from  $D_t$  )

$$\hat{m}(t) = \frac{D_t^{(1)}}{i_t}, \quad (13)$$

Here also, the contribution of the asymptomatic cases are compensated.

### C. Effective reproduction number

Since the original dynamics is a priori unknown, three formulations of the basic reproduction number  $\mathbf{R}_0$  were investigated, based on SIR model

$$\mathbf{R}_0^{\text{SIR}} = \frac{\beta}{\nu}, \quad (14)$$

SIRD model

$$\mathbf{R}_0^{\text{SIRD}} = \frac{\beta}{\nu + m}, \quad (15)$$

and SEi2RD model hypotheses:

$$\mathbf{R}_0^{\text{SEi2RD}} = \frac{\beta}{\nu + m} + \frac{(1-p)m}{\nu + m}. \quad (16)$$

The three formulations were tested to estimate the effective reproduction number

$$\mathbf{R}_t = \mathbf{R}_0 \times \frac{(S_{t=0} - I_t^{(0)} - V_t)}{N_t}, \quad (17)$$

the SIRD formulation was found the more realistic when applied to the synthetic data. The following formulation

$$\hat{\mathbf{R}}_t = \frac{\beta_t}{\nu_t + m_t} \times \frac{(S_{t=0} - I_t^{(0)} - V_t)}{N_t}, \quad (18)$$

was thus preferred – in practice – to estimate the effective reproduction number. Other formulations were kept to estimate the error resulting from this lack of knowledge.
