# Supplementary material for: COVID-19 in Africa: Underreporting, demographic effect, chaotic dynamics, and mitigation strategy impact
Source: PubMed Central journal article supplement (PMC9518880; doi:10.1371/journal.pntd.0010735), 2022-09-16
Supplement: pntd.0010735.s015.pdf [file pntd.0010735.s015.pdf]

## S3 Appendix for

### **Covid-19 in Africa: underreporting, demographic effect, chaotic dynamics, and mitigation strategies impact**

**Authors:** Nathan Thenon<sup>1,2†</sup>, Marisa Peyre<sup>2</sup>, Mireille Huc<sup>1</sup>, François Roger<sup>2</sup>, Sylvain Mangiarotti<sup>1\*†</sup>.

\*To whom correspondence should be sent: [sylvain.mangiarotti@ird.fr](mailto:sylvain.mangiarotti@ird.fr)

†These authors contributed equally to this work

## Appendix S3 - Models equations

All the global models obtained in the present study are based on the same general algebraic structure given in Eqs. (5) (in the main manuscript), with  $n = 3$ . It is thus sufficient to provide the detailed definition of the polynomial  $Q(X_1, X_2, X_3)$  to have the full model definition.

### 1. Cases models

The polynomials directly obtained for cases dynamics are given hereafter, with the initial conditions used in the simulations:

$$\begin{aligned}
 Q_{\text{Algeria}}^I = & +0.0796687009799944 + 0.0662341786995872 I_3^2 - \kappa_1 \times 0.0796215959831427 I_2 \\
 & + 0.038739626362673 I_2 I_3 + 0.00436665937204388 I_2^2 - 0.00226541691584844 I_2^2 I_3 \\
 & - 0.000422658530759521 I_2^3 - 0.00361610998969291 I_1 + 0.00115155507457535 I_1 I_3 \\
 & - 0.000428997637350344 I_1 I_3^2 + 0.000928781337541139 I_1 I_2 \\
 & - 0.000245339788878338 I_1 I_2 I_3 - 2.04818368769602e-05 I_1 I_2^2 + 3.93275783109323e-05 I_1^2 \\
 & - 1.04438432207189e-05 I_1^2 I_3 - 2.24656357540239e-06 I_1^2 I_2 \\
 & - \kappa_2 \times 1.33664436257257e-07 I_1^3
 \end{aligned} \tag{1}$$

for  $\kappa_1 = \kappa_2 = 1$ , with  $(I_1, I_2, I_3)_0 = (1.32140219, 0.40622939, 0.09728182)$ .

$$\begin{aligned}
 Q_{\text{Côte d'Ivoire}}^I = & -0.109797306029186 I_3 + 0.0205209287472364 I_3^2 - 0.0868905890387966 I_2 \\
 & + 0.00227419260860002 I_2 I_3 - 0.00256777264961512 I_2^2 - 5.64800118265148e-05 I_2^3 \\
 & + 0.00437757534400393 I_1 I_3 - 0.000206522894087883 I_1 I_3^2 + 0.000657379569145025 I_1 I_2 \\
 & - 1.00282332259123e-05 I_1 I_2 I_3 + 2.41794779500537e-05 I_1 I_2^2 + 3.73062321820389e-05 I_1^2 \\
 & - 2.16893269336703e-05 I_1^2 I_3 - 3.28208395744655e-06 I_1^2 I_2 - 2.26305046278701e-07 I_1^3
 \end{aligned} \tag{2}$$

with  $(I_1, I_2, I_3)_0 = (3.78019267, 1.03816738, 0.09672889)$ .

$$\begin{aligned}
 Q_{\text{Egypt}}^I = & +0.347551915847867 I_3^2 - 0.102945522563235 I_3^3 - 0.323684676282691 I_2 \\
 & + 0.236049232447228 I_2 I_3 - 0.0251438275023693 I_2 I_3^2 + 0.00623343603702519 I_2^2 \\
 & - 0.0065429655298832 I_2^2 I_3 + \kappa \times 0.00537960774185894 I_1 - 0.0032743965335608 I_1 I_3 \\
 & - 0.00165176991509053 I_1 I_3^2 + 0.00661374370806083 I_1 I_2 - 0.00187710176207968 I_1 I_2 I_3 \\
 & - 7.27100800119011e-05 I_1^2 + 2.48290326239702e-05 I_1^2 I_3 - 3.76578599389823e-05 I_1^2 I_2 \\
 & - 2.04103975309291e-08 I_1^3
 \end{aligned} \tag{3}$$

for  $\kappa = 1$ , and with  $(I_1, I_2, I_3)_0 = (18.56026154, 0.54684471, -0.07842929)$ .

$$\begin{aligned}
Q_{\text{Ethiopia}}^I &= +0.267967672783547I_3^2 - 0.0390728732756903I_3^3 - 0.0593653335905724I_2 \\
&+ 0.0043915094574951I_1 - \kappa \times 0.00106679691473617I_1I_3^2 + 1.18139802334684e-05I_1I_2^2 \\
&- 7.5725445491524e-05 I_1^2 + 2.12654153118063e-07 I_1^2
\end{aligned} \tag{4}$$

for  $\kappa = 1$ , and with  $(I_1, I_2, I_3)_0 = (0.148557439, 0.007301641, -0.001853553)$ .

$$\begin{aligned}
Q_{\text{Ghana}}^I &= -0.460640870877873 I_3 - 0.0106389881683115 I_3^2 - 0.164427462210515 I_2 \\
&+ 0.0398049970486589 I_2I_3 - 0.00203407583692159 I_2I_3^2 - 0.00010393348100922 I_2^3 \\
&+ 0.00413563939508601 I_1 + 0.0055772972346767 I_1I_3 + 0.00162407387907056 I_1I_2 \\
&- 0.000129625360168781 I_1I_2I_3 + 6.48258295454445e-06 I_1I_2^2 \\
&- 3.55385837279337e-05 I_1^2 - 1.2103505242464e-05 I_1^2I_3 - 3.38899598975704e-06 I_1^2I_2 \\
&+ \kappa \times 3.71663071078492e-08 I_1^3
\end{aligned} \tag{5}$$

with  $\kappa = 1$  (applied to the last monomial) and with  $(I_1, I_2, I_3)_0 = (1.5731661, 0.7370571, 0.2645352)$ .

$$\begin{aligned}
Q_{\text{Kenya}}^I &= -0.518897751110126 - 0.00695195214544046I_3^2 - 0.266696341079546I_2 \\
&+ 0.0357899959683549 I_2I_3 - 0.00538122870953072I_2I_3^2 - \kappa_1 \times 40.00502265396494897I_2^2 \\
&- 0.000469295493196084 I_2^3 + 0.0111278464207414I_1 + 8.23468666450821e-06 I_1I_3^2 \\
&+ 0.00283421917402513I_1I_2 - 0.000128470955256436I_1I_2I_3 + 1.35062768144442e-05I_1I_2^2 \\
&- \kappa_2 \times 4.30872131966366e-05I_1^2 - 4.80514923485185e-06I_1^2I_2 + 4.49423780653955e-08I_1^3
\end{aligned} \tag{6}$$

for  $\kappa_1 = \kappa_2 = 1$ , with  $(I_1, I_2, I_3)_0 = (63.007946, 1.062328, 1.041740)$ .

$$\begin{aligned}
Q_{\text{Libya}}^I &= -0.0295999803766723I_2 + 0.00451448056779914I_1 - 5.37649858959794e-06I_1^2 \\
&- 2.11264598883614e-08I_1^2I_2 + 1.5571629698307e-09I_1^3
\end{aligned} \tag{7}$$

with  $(I_1, I_2, I_3)_0 = (1.68428705, 0.17532753, -0.06714965)$ .

$$\begin{aligned}
Q_{\text{Namibia}}^I &= +0.794849004986058 - 0.0137426747828601I_3^2 \\
&- \kappa_1 \times 0.000880669916336909I_3^3 - 0.138951149606636I_2 \\
&- 0.000315256792814862 I_2I_3^2 + 0.000919005556985513 I_2^2 - 1.82934159221164e-05I_2^3 \\
&+ 0.000151489562878084I_1I_3 + \kappa_2 \times 0.000350599992671956I_1I_2 \\
&+ 1.97687227909123e-07I_1I_2^2 - 4.86511806983137e-06I_2^2 - 1.03432015551895e-07I_1^2I_3 \\
&- 1.59984646726366e-07I_1^2I_2 + \kappa_3 \times 2.38810765381376e-09I_1^3
\end{aligned} \tag{8}$$

with  $(I_1, I_2, I_3)_0 = (3.6059480, 0.6592280, 0.3532457)$ .

$$\begin{aligned}
Q_{\text{Nigeria}}^I &= +0.0343333345190545 - 0.0756396775696497I_3^2 - 0.110320028223132I_2 \\
&+ 0.0339922989190682I_2I_3 + 0.0101452563456526I_2^2 - 0.00366293002327367I_2^2I_3 \\
&- 0.000934181818872205I_2^3 - 0.00237756302125567I_1 + 0.00115450490243978I_1I_3 \\
&+ 0.00097091291275902I_1I_3^2 + 0.00223618041065029I_1I_2 - 0.000241108286292507I_1I_2I_3 \\
&- 8.80125486240076e-05I_1I_2^2 + 3.48526219172797e-05I_1^2 - 5.20379261720431e-06I_1^2I_3 \\
&- 1.1683216302048e-05I_1^2I_2 - 1.34218095134093e-07I_1^3
\end{aligned} \tag{9}$$

with  $(I_1, I_2, I_3)_0 = (0.12468916, 0.04379826, 0.00517157)$ .

$$\begin{aligned}
Q_{\text{Senegal}}^I &= +0.0732315517322414 + 0.0540579926797526I_3^2 - 0.00586775369583505I_3^3 \\
&- 0.0640643754193143I_2 + 0.00526800398265657I_2I_3 - 0.00397448103442021I_2I_3^2 \\
&+ 0.0030654156044303I_2^2 - 0.000464330034435878I_2^3 - 0.00315639102570492I_1 \\
&+ 0.000674573931781396I_1I_3 - 0.000226150093680181I_1I_3^2 + 0.000292153420066769I_1I_2 \\
&- 5.78601736293428e-06I_1I_2^2 + 2.53714446410718e-05I_1^2 - 2.48578957003552e-06I_1^2I_3 \\
&- 4.92184930500184e-08I_1^3
\end{aligned} \tag{10}$$

with  $(I_1, I_2, I_3)_0 = (3.46637146, 0.64073597, 0.0833453)$ .

$$\begin{aligned}
Q_{\text{South Africa}}^I &= -0.12695841531611I_2 - 1.55163089753807e-05I_2^3 + 0.00329061175264698I_1 \\
&+ 0.000298826837461897I_1I_2 + 3.93145619176576e-07I_1I_2^2 - 8.23576970097779e-06I_1^2 \\
&- 1.02521696340842e-07I_1^2I_2 + 2.81850646768005e-09I_1^3
\end{aligned} \tag{11}$$

with  $(I_1, I_2, I_3)_0 = (5.2297639, 2.4304931, 0.7082607)$ .

$$\begin{aligned}
Q_{\text{Zimbabwe}}^I &= -0.0900967854717015I_3 - 0.00661602029774296I_3^3 - 0.0491406408270159I_2 \\
&- 0.00255290659893318 I_2I_3^2 - 0.000541138403495552 I_2^2I_3 - 0.000282909762030189I_2^3 \\
&+ 0.00272797031585041 I_1I_3 - 0.000256283420644421 I_1I_3^2 - 5.10666100414135e-05I_1I_2^2 \\
&+ 7.23106520159802e-05 I_1^2 - 4.8621558720886e-07I_1^2I_2
\end{aligned} \tag{12}$$

with  $(I_1, I_2, I_3)_0 = (4.773708481, 0.365475634, 0.005784271)$ .

Other dynamical behaviours were found for cases dynamics. For Ghana, a bistable regime was discovered when tuning Eq. (5) with  $\kappa = 0.85$ , giving rise to two separated attractors (see Fig 2D in the main manuscript) when starting from initial conditions  $(I_1, I_2, I_3)_0 = (1.5731661, 0.7370571, 0.2645352)$  (in magenta), or  $(I_1, I_2, I_3)_0 = (400, 0, 0)$  (in green).

Interestingly, the polynomial

$$\begin{aligned}
Q_{\text{Ghana2}}^I = & -0.387949459699332I_3 - 0.155078962631704I_2 + 0.0337744581932721I_2I_3 \\
& - 0.00195768348928947I_2I_3^2 - 0.000121195029459481I_2^3 + 0.00584450570536255I_1 \\
& + 0.00389337406184227I_1I_3 + 0.00153230608377978I_1I_2 - 0.000109216307590714I_1I_2I_3 \quad (13) \\
& + 6.59866420494425e-06I_1I_2^2 - 5.85677377292846e-05I_1^2 - 7.69090331373171e-06I_1^2I_3 \\
& - 3.05365823727568e-06I_1^2I_2 + 8.85135966396584e-08I_1^3
\end{aligned}$$

very similar to the other model obtained for Ghana (same terms as Eq. (5) except the term in  $I_3^2$  missing), enabled to reproduce the whole types of trajectories in a single chaotic attractor (Fig 2E in the main manuscript), also with  $(I_1, I_2, I_3)_0 = (1.5731661, 0.7370571, 0.2645352)$ .

For Kenya, other interesting dynamics could be obtained by tuning the parameters of Eqs (6). The more complex situation was obtained with the original equations (Fig. 2C in green, in the main manuscript) with large oscillations around a central point associated with smaller oscillations around small values (100 cases per day) and large values (450 cases per day and 520 cases per day). With the parameterization  $\kappa_1 = 1.08$  and  $\kappa_2 = 0.9901$ , the smaller oscillations were removed, leading large oscillations around a genus-1 torus (Fig 2C in red, in the main manuscript); with  $\kappa_1 = 1.$  and  $\kappa_2 = 0.99802$ , keeping the large oscillations, the small oscillations around 450 cases per day were fostered (not shown); with  $\kappa_1 = 1.$  and  $\kappa_2 = 0.9882353$ , only small oscillations around 500 cases per day were kept, slowly converging to a period-1 attractor around this value (Fig 2C in blue, in the main manuscript). The same initial conditions with  $(I_1, I_2, I_3)_0 = (63.007946, 1.062328, 1.041740)$  were used in all the cases.

For Algeria, it was found possible to modify the average value of the periodic cycle at the convergence by tuning parameter  $\kappa_2$  of Eq. (1) (see Fig 2B in the main manuscript). A quicker propagation of the epidemic is obtained for  $\kappa_2 = 1.2$  (oscillations around 250 cases per day, in blue), a slower (but with larger oscillations) one for  $\kappa_2 = 0.75$  (average around 150 cases per day, in magenta). For  $\kappa_1 = 1.7$ , a very slow convergence to a period-1 cycle (in brown) was obtained through a nonchaotic toroidal transient (in cyan).

For Egypt, variations of parameter enabled  $\kappa$  in Eq. (3) enabled to develop a phase non coherent dynamics (with  $\kappa = 1.7$ , Fig 2A in green, in the main manuscript), or to reduce it (with  $\kappa = 1.25$ , Fig 2A in magenta, in the main manuscript).

## 2. Deaths models

The polynomials directly obtained for deaths are given hereafter:

$$\begin{aligned}
Q_{\text{Algeria}}^D = & -\kappa \times 0.190661009721399D_2 - 0.00288901208813148D_1 \\
& + 0.103827829105124D_1D_2 + 0.00199212706187995D_1^2 \quad (14) \\
& - 0.0180987589643191D_1^2D_2 - 0.000314923292730593D_1^3
\end{aligned}$$

for  $\kappa = 1$ , and with  $(D_1, D_2, D_3)_0 = (2.350603100, 0.090248589, -0.004403239)$ .

$$\begin{aligned}
Q_{\text{Cameroon}}^D &= +12.7808324888061D_3^2 - 19.8284672476195D_3^3 - 0.269460409652003D_2^2 \\
&- 1.27015254177009D_2^3 + 0.0825216825254995D_1D_3 - 2.88440011271812D_1D_3^2 \\
&+ 0.22971550408166D_1D_2D_3 + 0.117082067115412D_1D_2^2 + 0.000734004211241529D_1^2 \\
&- 0.0286453291499263D_1^2D_3 - 0.000273285434912587D_1^3
\end{aligned} \tag{15}$$

with  $(D_1, D_2, D_3)_0 = (1.01698111, 0.09243926, 0.01258062)$ .

$$\begin{aligned}
Q_{\text{Côte d'Ivoire}}^D &= -0.00159656293370687 + 0.152839563029428D_3 - 9.09699927450249D_3^2 \\
&- 0.208631827155974D_2 - 2.50158590455907D_2D_3 - 278.888824651496D_2D_3^2 \\
&+ 5.50196226099524D_2^2 - 167.400865912334D_2^2D_3 - 31.1644481409565D_2^3 \\
&+ 0.0104571375363452D_1 - 0.748276878762981D_1D_3 + 10.6568675409104D_1D_3^2 \\
&+ 0.641120512140422D_1D_2 - 0.998951052405393D_1D_2D_3 - 4.9311392025704D_1D_2^2 \\
&- 0.0245513340513308D_1^2 + 0.685581078491185D_1^2D_3 - 0.433808549960391D_1^2D_2 \\
&+ 0.014485432350422D_1^3
\end{aligned} \tag{16}$$

with  $(I_1, I_2, I_3)_0 = (0.79664811, 0.027177057, 0.001491929)$ .

$$\begin{aligned}
Q_{\text{Egypt}}^D &= +0.00360424207981085 - 0.196495303672811D_3 + 3.16277068848196D_3^2 \\
&- 1.1786088817269D_3^3 - 0.193903628313008D_2 + 1.54974618784215D_2D_3 \\
&- 4.14049520195359D_2D_3^2 - 0.131610160457468D_2^2 + 0.525723366869267D_2^2D_3 \\
&- 0.126769464395039D_2^3 - 0.00121898342983667D_1 + 0.106333348895004D_1D_3 \\
&- 0.32858057170231D_1D_3^2 + 0.0609719574123028D_1D_2 - 0.260890028525343D_1D_2D_3 \\
&+ 0.0264461215125738D_1D_2^2 + 0.000122930884429469D_1^2 - 0.0116361672960978D_1^2D_3 \\
&- 0.00530611549106901D_1^2D_2 - 1.32225338943395e-05D_1^3
\end{aligned} \tag{17}$$

with  $(D_1, D_2, D_3)_0 = (0.058557124, 0.014613524, 0.003019658)$ .

$$\begin{aligned}
Q_{\text{Libya}}^D &= +0.534324550933693D_3 - 0.0724075856532136D_3^3 - 0.0787307026820384D_2 \\
&+ 0.0444095960603132D_2D_3 + 0.0248069712372749D_2^2 + 0.00520710316088048D_1 \\
&- 0.0501062211581986D_1D_3 - 0.00244961892498698D_1D_2 \\
&- 0.0022093702169076D_1D_2D_3 - 0.000969871105595799D_1D_2^2 \\
&- 0.000454394753471303D_1^2 + 0.00114054290614677D_1^2D_3 + 1.06162147077378e-05D_1^3
\end{aligned} \tag{18}$$

with  $(D_1, D_2, D_3)_0 = (0.495186801, 0.030903699, 0.001010042)$ .

$$\begin{aligned}
Q_{\text{Namibia}}^D &= +0.558730791610019D_3 - 1.53328090439678D_3^3 + 0.0589878992077652D_2^2 \\
&- 0.0320068007156988D_2^3 - 0.119662495432852D_1D_3 - 0.00717005062822875D_1D_2^2 \\
&- 0.00036681528786263D_1^2 + 0.00566621343689842D_1^2D_3 \\
&- 0.000157851160666792D_1^2D_2 + 3.54620325513566e-05D_1^3
\end{aligned} \tag{19}$$

with  $(D_1, D_2, D_3)_0 = (0.59192824, 0.19602412, 0.02033359)$ .

$$\begin{aligned}
Q_{\text{South Africa}}^D &= +0.00567748987859232 - 0.040796545812204D_2 - 0.00163361617685516D_1 \\
&+ 0.00102963245050581D_1D_2 + 4.79804286665403e-05D_1^2 - 1.10988078532591e-05D_1^2D_2 \\
&- 3.16206776520503e-07D_1^3
\end{aligned} \tag{20}$$

with  $(D_1, D_2, D_3)_0 = (16,3012378, 1.0437449, 0.3989576)$ .

$$\begin{aligned}
Q_{\text{Tunisia}}^D &= -0.0726344932529531D_2 + 0.0013053835982996D_1 \\
&+ 0.00540995731970615D_1D_2 - 6.75920327930758e-05D_1^2 \\
&- 0.000130898642568653D_1^2D_2 + 8.50605267050244e-07D_1^3
\end{aligned} \tag{21}$$

with  $(D_1, D_2, D_3)_0 = (0.98943082, 0.06020075, 0.01332138)$ .

$$\begin{aligned}
Q_{\text{Zimbabwe}}^D &= +0.0926920347949401D_3 + 0.835735156045351D_3^2 - 0.718300162722018D_3^3 \\
&- 0.143012408490209D_2 + 0.187747965940508D_2D_3 - 0.33430941808173D_2D_3^2 \\
&+ 0.0504419205144352D_2^2 - 0.0480405031882636D_2^2D_3 - 0.0211663129285957D_2^3 \\
&- 0.00199370398539795D_1 - 0.0219149445790986D_1D_3 - 0.00883025440665343D_1D_3^2 \\
&+ 0.0148961187703786D_1D_2 - 0.0019337819406716D_1D_2D_3 \\
&- 0.00181912359250932D_1D_2^2 - 4.24281198206337e-05D_1^2 \\
&+ 0.000910705108492471D_1^2D_3 - 0.000117812354585106D_1^2D_2 \\
&+ 6.57330150088683e-06D_1^3
\end{aligned} \tag{22}$$

with  $(D_1, D_2, D_3)_0 = (0.306066088, 0.029837267, 0.00810896)$ .

Other dynamical behaviours were found for deaths dynamics. For Algeria, the following model obtained:

$$\begin{aligned}
Q_{\text{Algeria2}}^D &= +0.0068330917922184 - 0.188512523788712D_2 + 0.0795239378098587D_2^2 \\
&- 0.0133918434091473D_1 + 0.10178212516762D_1D_2 - 0.0161682913315983D_1D_2^2 \\
&+ 0.0064733944270254D_1^2 - 0.0176403748649202D_1^2D_2 - 0.00087871337007575D_1^3
\end{aligned} \tag{23}$$

also with  $(D_1, D_2, D_3)_0 = (2.350603100, 0.090248589, -0.004403239)$ . Interestingly, whereas the model based on Eq. (14) was developing slow and smoothed increases followed by decreases associated with large oscillations, this other one (Eq. 23) is developing slow and smooth decreases followed by large oscillations during the increasing period which suggest that these two behaviours are dynamically rather close one to another. Their dynamics is presented in Fig 2F in the main mancript.
