# Supplementary material for: COVID-19 in Africa: Underreporting, demographic effect, chaotic dynamics, and mitigation strategy impact
Source: PubMed Central journal article supplement (PMC9518880; doi:10.1371/journal.pntd.0010735), 2022-09-16
Supplement: pntd.0010735.s016.pdf [file pntd.0010735.s016.pdf]

# S1 Table for

## Covid-19 in Africa: underreporting, demographic effect, chaotic dynamics, and mitigation strategies impact

**Authors:** Nathan Thenon<sup>1,2†</sup>, Marisa Peyre<sup>2</sup>, Mireille Huc<sup>1</sup>, François Roger<sup>2</sup>, Sylvain Mangiarotti<sup>1\*†</sup>.

\*To whom correspondence should be sent: [sylvain.mangiarotti@ird.fr](mailto:sylvain.mangiarotti@ird.fr)

†These authors contributed equally to this work

### Table S1. Dynamical regimes of the models.

**Table S1:** Dynamical regimes of the models. The dynamics was investigated considering 100 000 integration time steps of 0.1 day each (corresponding to a duration of ~24 years). Metastable is mentioned when the integration could be checked on 20 000 time steps (~6 years) only. P1, P2 and P5 refer to period cycles of period one, two and five, respectively. Toroidal chaos refers to chaotic attractors structured around a toroidal structure (see [1] for details).

| Country  | Algeria        | Cameroon | Côte d'Ivoire | Egypt            | Ethiopia         | Ghana          | Kenya            |
|----------|----------------|----------|---------------|------------------|------------------|----------------|------------------|
| <i>I</i> | P1             | ∅        | P1            | Chaos            | Chaos            | Bistable chaos | Metastable chaos |
| <i>D</i> | Toroidal chaos | Chaos    | P2            | Metastable chaos | ∅                | ∅              | ∅                |
| Country  | Libya          | Namibia  | Nigeria       | Senegal          | South Africa     | Tunisia        | Zimbabwe         |
| <i>I</i> | ∅              | Chaos    | P1            | P1               | Metastable chaos | ∅              | P5               |
| <i>D</i> | Torus          | Chaos    | ∅             | ∅                | Torus            | Torus          | Chaos            |

### Reference.

1. Mangiarotti S, Letellier C, Topological characterization of toroidal chaos: A branched manifold for the Deng toroidal attractor, *Chaos: An Interdisciplinary Journal of Nonlinear Science* 2021; 31:013129. doi: 10.1063/5.0025924.
