# Supplementary material for: COVID-19 in Africa: Underreporting, demographic effect, chaotic dynamics, and mitigation strategy impact
Source: PubMed Central journal article supplement (PMC9518880; doi:10.1371/journal.pntd.0010735), 2022-09-16
Supplement: pntd.0010735.s017.pdf [file pntd.0010735.s017.pdf]

## S2 Table for

### **Covid-19 in Africa: underreporting, demographic effect, chaotic dynamics, and mitigation strategies impact**

**Authors:** Nathan Thenon<sup>1,2†</sup>, Marisa Peyre<sup>2</sup>, Mireille Huc<sup>1</sup>, François Roger<sup>2</sup>, Sylvain Mangiarotti<sup>1\*†</sup>.

\*To whom correspondence should be sent: [sylvain.mangiarotti@ird.fr](mailto:sylvain.mangiarotti@ird.fr)

†These authors contributed equally to this work

#### **Table S2. Models forecasting performances.**

**Table S2:** Models forecasting performances: forecasting error (in % of the maximum value observed during the modelling period), for a 10 day prediction horizon (90% confidence level) of daily cases and deaths per million inhabitants. Error level is provided for the validation window and also (in brackets) for the modelling window. The modelling and validation (in brackets) period length (in day) are also provided.

| Countries          | Algeria  |          | Cameroon | Côte d'Ivoire | Egypt    | Ethiopia     | Ghana    |          |
|--------------------|----------|----------|----------|---------------|----------|--------------|----------|----------|
|                    | 1        | 2        |          |               |          |              | 1        | 2        |
| $\% e_{\tau=10}^I$ | 7(7)     | –        | –        | 58(23)        | 218(64)  | 34(10)       | 15(28)   | 16(29)   |
| $T$                | 98(366)  | –        | –        | 107(352)      | 105(138) | 151(308)     | 247(212) | 247(212) |
| $\% e_{\tau=10}^D$ | 12(14)   | 14(15)   | 29(11)   | 51(11)        | 9(13)    | –            | –        | –        |
| $T$                | 105(266) | 105(266) | 247(192) | 251(200)      | 103(340) | –            | –        | –        |
| Countries          | Kenya    | Libya    | Namibia  | Nigeria       | Senegal  | South Africa | Tunisia  | Zimbabwe |
|                    |          |          |          |               |          |              |          |          |
| $\% e_{\tau=10}^I$ | 29(11)   | 26(13)   | 55(8)    | 6(12)         | 10(13)   | 29(6)        | –        | 125(18)  |
| $T$                | 143(131) | 170(281) | 230(146) | 103(360)      | 105(240) | 268(192)     | –        | 234(167) |
| $\% e_{\tau=10}^D$ | –        | 62(18)   | 90(21)   | –             | –        | 5(19)        | 20(17)   | 3(7)     |
| $T$                | –        | 139(250) | 243(104) | –             | –        | 103(98)      | 111(185) | 105(262) |
